# Supplementary material for: Pyocin S5 Import into Pseudomonas aeruginosa Reveals a Generic Mode of Bacteriocin Transport
Source: PubMed Central journal article supplement (PMC7064778; doi:10.1128/mbio.03230-19), 2020-03-10

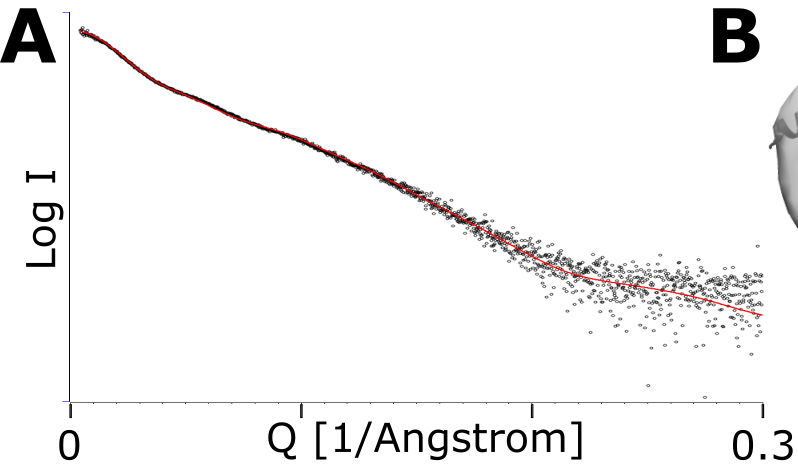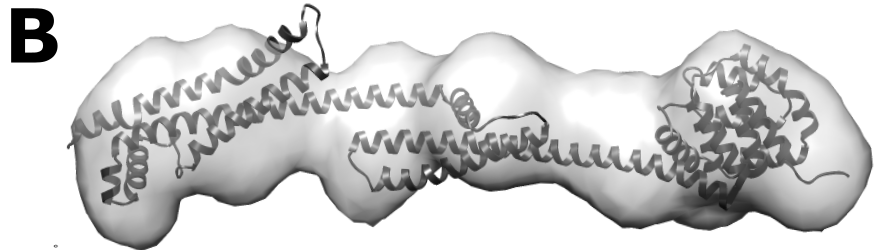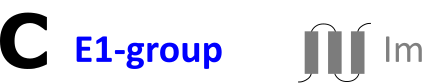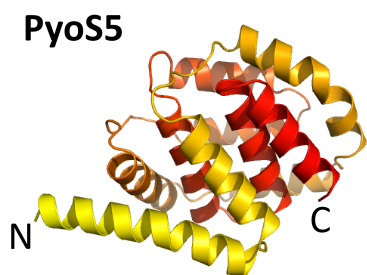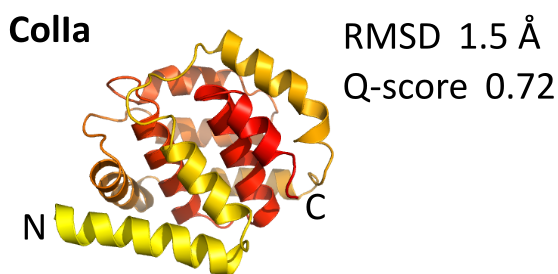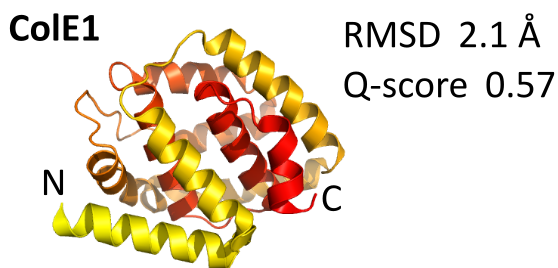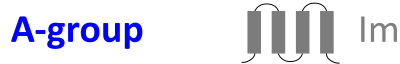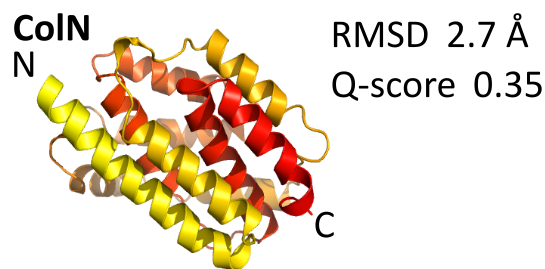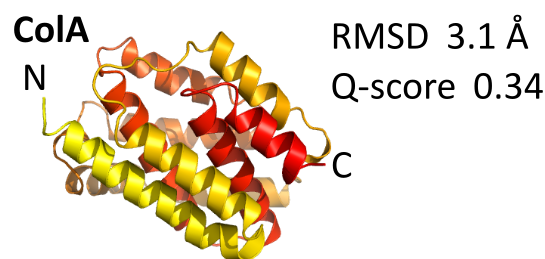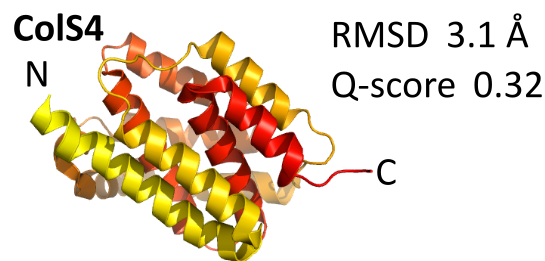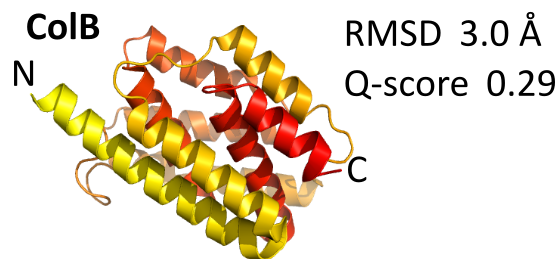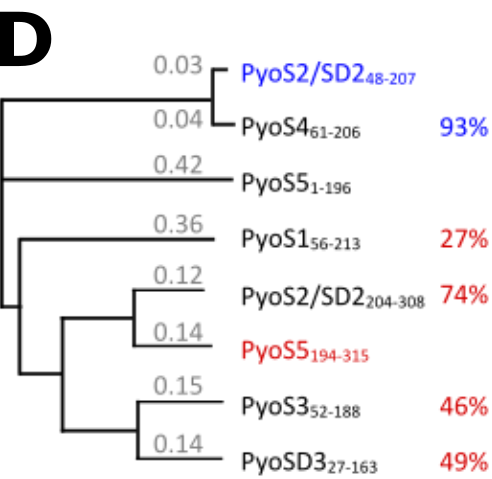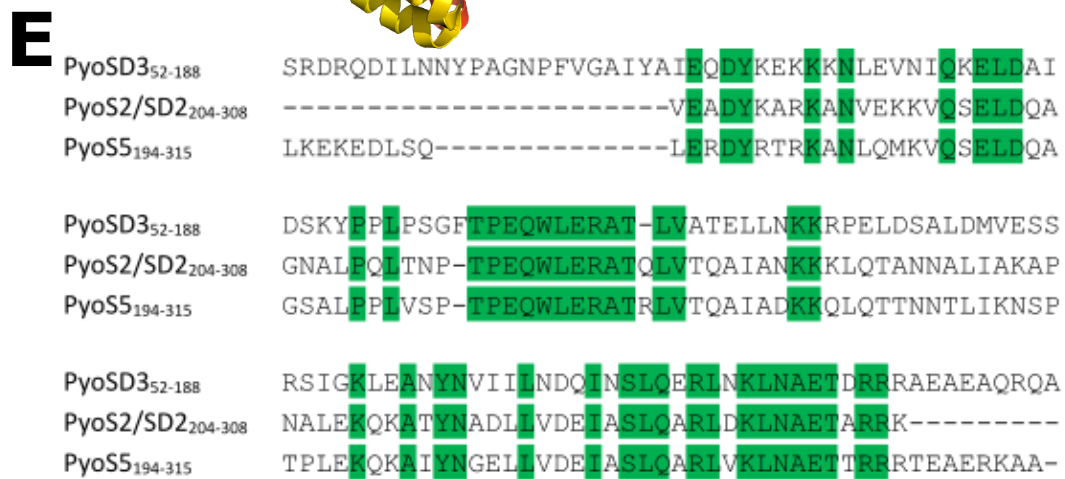

Supplement: mBio.03230-19-sf002.pdf [file mBio.03230-19-sf002.pdf]
