# Supplementary material for: Pyocin S5 Import into Pseudomonas aeruginosa Reveals a Generic Mode of Bacteriocin Transport
Source: PubMed Central journal article supplement (PMC7064778; doi:10.1128/mbio.03230-19), 2020-03-10

| PyoS2     | PyoS4     | PyoS5     | ColBPyoS5 | PyoS2     | PyoS4     | PyoS5     | ColBPyoS5 |
|-----------|-----------|-----------|-----------|-----------|-----------|-----------|-----------|
| 1 $\mu$ M | 1 $\mu$ M | 1 $\mu$ M | 1 $\mu$ M | 1 $\mu$ M | 1 $\mu$ M | 1 $\mu$ M | 1 $\mu$ M |

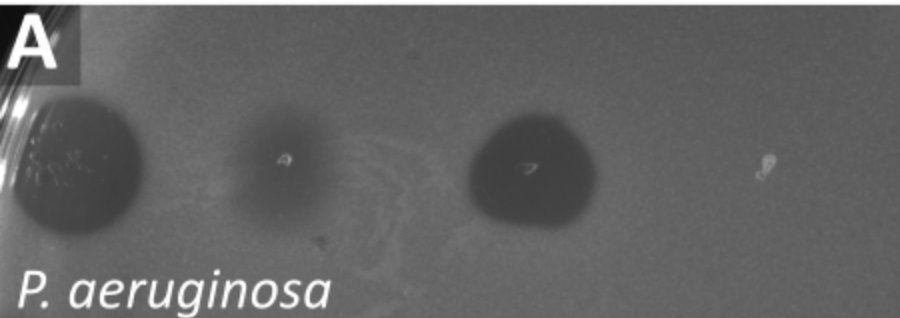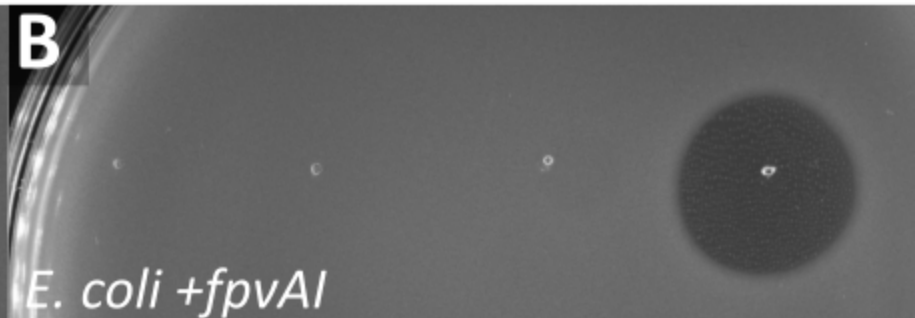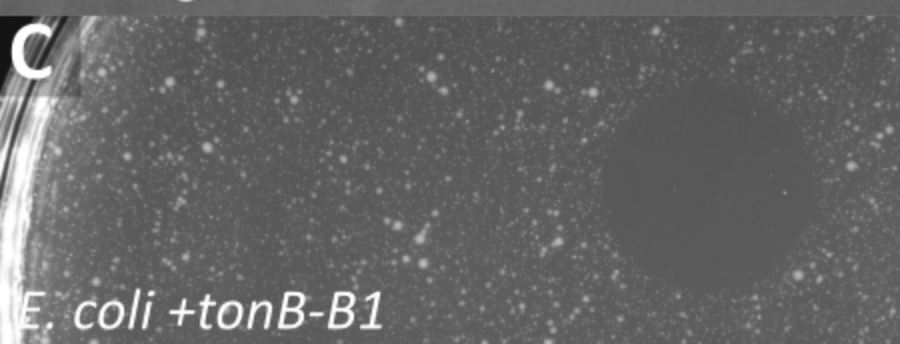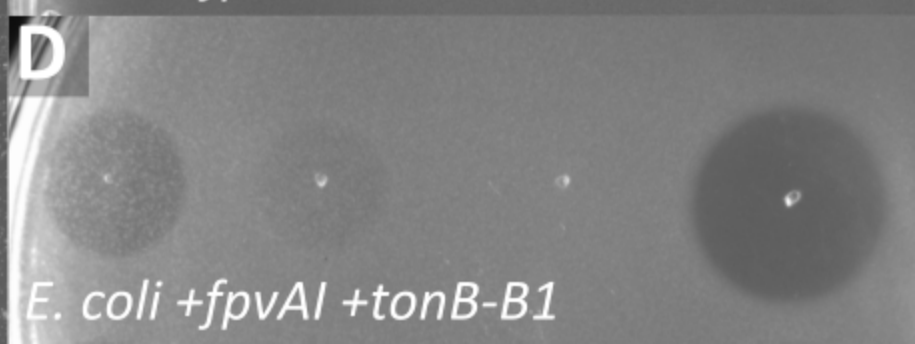

Supplement: mBio.03230-19-sf008.pdf [file mBio.03230-19-sf008.pdf]
